# Supplementary material
Source: Springer Nature journal article supplement (https://www.springermedizin.de/resource/supplementary/40170_2013_24_MOESM1_ESM.pdf/25787662)

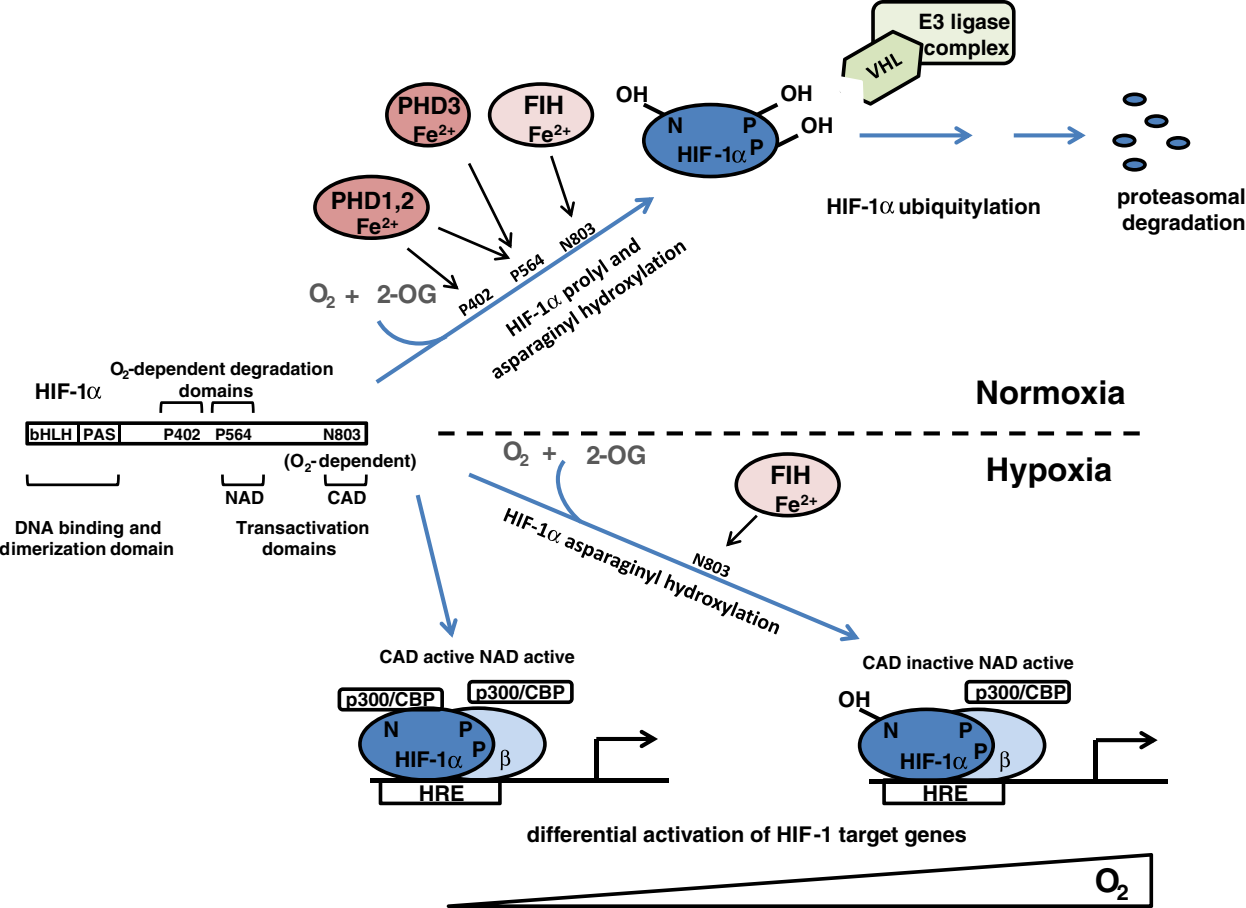

Supplement: MOESM1 [file 25787662]
